# Supplementary material
Source: PubMed Central journal article supplement (PMC9759790)
Supplement: mmc1.pdf [file mmc1.pdf]

# THE LANCET

## Infectious Diseases

### Supplementary appendix

This appendix formed part of the original submission and has been peer reviewed. We post it as supplied by the authors.

Supplement to: DiazGranados CA, Bonaparte M, Wang H, et al. Accuracy and efficacy of pre-dengue vaccination screening for previous dengue infection with five commercially available immunoassays: a retrospective analysis of phase 3 efficacy trials. *Lancet Infect Dis* 2020; published online Nov 16. [https://doi.org/10.1016/S1473-3099\(20\)30695-2](https://doi.org/10.1016/S1473-3099(20)30695-2).

---

## Supplementary Materials

|                                                                                                                                                 |    |
|-------------------------------------------------------------------------------------------------------------------------------------------------|----|
| Table S1. Details of the immunoassays tested.....                                                                                               | 2  |
| Table S2. Dengue serostatus by the reference algorithm.....                                                                                     | 4  |
| Table S3. Baseline dengue serostatus in the immunogenicity subsets of CYD14 and CYD15 by the reference algorithm and treatment assignment ..... | 5  |
| Table S4. Baseline characteristics of the EUROIMMUN-ELISA test positive participants .....                                                      | 6  |
| Table S5. Baseline characteristics of the Panbio-ELISA test positive participants .....                                                         | 7  |
| Table S6. Baseline characteristics of the TELL ME FAST-RDT test positive participants .....                                                     | 8  |
| Table S7. Baseline characteristics of the SD BIOLINE-RDT test positive participants .....                                                       | 9  |
| Table S8. Baseline characteristics of the <i>OnSite</i> -RDT test positive participants.....                                                    | 10 |
| Table S9. Vaccine efficacy against symptomatic VCD in test-positive subjects by different age cut offs (Month 0 – Month 25) .....               | 11 |
| Table S10. Vaccine efficacy against hospitalised VCD in test positive subjects by different age cut offs (Month 0 – Month 72) .....             | 12 |

**Table S1. Details of the immunoassays tested**

| Name                                                                      | EUROIMMUN anti-dengue virus IgG ELISA | Panbio® Dengue IgG Indirect ELISA <sup>1</sup> | TELL ME FAST Dengue IgG/IgM Combo Test Device <sup>2</sup> | SD BIOLINE Dengue IgG/IgM WB <sup>1</sup> | OnSite Dengue IgG/IgM Combo Rapid Test CE <sup>1</sup> |
|---------------------------------------------------------------------------|---------------------------------------|------------------------------------------------|------------------------------------------------------------|-------------------------------------------|--------------------------------------------------------|
| Assay Type                                                                | ELISA                                 | ELISA                                          | RDT                                                        | RDT                                       | RDT                                                    |
| <b>Company</b>                                                            | Euroimmun                             | Alere (Abbott)                                 | Biocan Diagnostics, Inc                                    | Alere (Abbott)                            | CTK Biotech, Inc                                       |
| <b>Test catalogue number</b>                                              | EI 266b-9601 G                        | 10PE30                                         | B803C                                                      | 11FK20                                    | R0061C                                                 |
| <b>Package insert,</b>                                                    | EI_266bG_A_UK_C04,                    | 01PE30 Rev.1,                                  | Rev 02/2016/RUO                                            | 11FK20-02-1,                              | PI-R0061C Rev. I1.0,                                   |
| <b>Date on insert</b>                                                     | 08-09-2011                            | 08-2013                                        | 02-2016                                                    | 01-2009                                   | 21-01-2018                                             |
| <b>Assay principle</b>                                                    | ELISA                                 | ELISA                                          | Lateral flow immunochromatography                          | Lateral flow immunochromatography         | Lateral flow immunochromatography                      |
| <b>Dengue antigen</b>                                                     | Highly purified DENV2 virus antigens  | Purified dengue virus antigen                  | Recombinant dengue antigen                                 | Dengue recombinant envelope antigen       | Dengue recombinant envelope antigens                   |
| <b>Class of Ig detected</b>                                               | IgG                                   | IgG                                            | IgG, IgM                                                   | IgG, IgM                                  | IgG, IgM                                               |
| <b>Specimen type</b>                                                      | Serum or plasma                       | Serum                                          | Whole blood serum or plasma                                | Whole blood, serum or plasma              | Whole blood, serum or plasma                           |
| <b>Sample volume required</b>                                             | 10 µL                                 | 10 µL                                          | 10 µL                                                      | 10 µL                                     | 5 µL                                                   |
| <b>Time to result from blood sample</b>                                   | minimum 2.5 hrs*                      | minimum 2.5 hrs*                               | 15–20 minutes†                                             | 15–20 minutes†                            | 20–25 minutes†                                         |
| <b>Number of readers</b>                                                  | NA                                    | NA                                             | 1                                                          | 2‡                                        | 1                                                      |
| <b>Storage temp</b>                                                       | 2–8°C                                 | 2–8°C                                          | 2–30°C                                                     | Room temperature                          | 2–30°C                                                 |
| <b>Cross-reactivity, % (number positive/number tested)<sup>¶1,2</sup></b> |                                       |                                                |                                                            |                                           |                                                        |
| Zika                                                                      | 8 (2/26)                              | 34 (14/41)                                     | 3 (1/38)                                                   | 7 (3/41)                                  | 0 (0/41)                                               |
| Japanese Encephalitis                                                     | 0 (0/40)                              | 3 (1/37)                                       | 0 (0/40)                                                   | 0 (0/37)                                  | 0 (0/37)                                               |
| Yellow Fever                                                              | 0 (0/49)                              | 0 (0/57)                                       | 4 (2/49)                                                   | 0 (0/57)                                  | 0 (0/57)                                               |

---

West Nile virus

10 (6/59)

51 (30/59)

0 (0/59)

7 (4/59)

0 (0/59)

---

\*Based on inclusion of incubation times from the assay protocol and excluding time for sample transportation to the laboratory, batch analysis and reporting to the clinician (two visits for potential vaccine recipients). †Serum/plasma needs to be separated by centrifugation before testing adds approximately 30 minutes to test. ‡Two readers were used, with pre-defined plan to score discordant readings (+/-) as a positive test, sensitivity analyses were also performed scoring discordant readings as negative. ¶ Percentage of dengue seronegative samples that were incorrectly classified by the immunoassay.

ELISA, enzyme-linked immunosorbent assay; Ig, immunoglobulin; RDT, rapid diagnostic test; temp, temperature

<sup>1</sup>Data for cross-reactivity sample selection and results for the *OnSite*-RDT, SD BIOLINE-RDT and Panbio-ELISA reported in Bonaparte M, Zheng L, Garg S, et al. Evaluation of rapid diagnostic tests and conventional enzyme-linked immunosorbent assays to determine prior dengue infection. *Journal of Travel Medicine* 2019; 26; <sup>2</sup>data for the TELL ME FAST-RDT reported in Bonaparte M, Huleatt J, Hodge S, et al. Evaluation of dengue serological tests available in Puerto Rico for identification of prior dengue infection for pre-vaccination screening. *Diagnostic microbiology and infectious disease* 2019;114918. Cross-reactivity data for the EUROIMMUN-ELISA has not previously been published.

Current availability of the ELISAs and RDTs: EUROIMMUN-ELISA is registered in Latin America (Brazil, Colombia, Cuba, Mexico, Peru, and Venezuela), Asia (Australia, Thailand and India) and elsewhere (Belarus, Canada, European Union [EU], Macedonia, Russia, Saudi Arabia, Ukraine and Serbia); the Panbio-ELISA is registered in Latin America (Argentina, Brazil, Colombia, Ecuador, Guatemala, Mexico, Paraguay, and Peru), Asia (Australia, Cambodia, Indonesia, Malaysia, Singapore, and Thailand), and elsewhere (EU, Germany, Israel, Italy, and Portugal); the TELL ME FAST-RDT is registered in Latin America (Costa Rica, Ecuador, El Salvador, Guatemala, Guyana, Paraguay, and Trinidad & Tobago), Asia (Laos, Nepal, Philippines, and Pakistan), and elsewhere (Angola, EU, Iraq, Kenya, Lebanon, Tanzania, and Tunisia); the SD BIOLINE-RDT is registered in Latin America (Brazil and Colombia), Asia (Australia, Bangladesh, Cambodia, India, Indonesia, Malaysia, Singapore, and Thailand), and elsewhere (Ethiopia, EU, Germany, Italy, Russia, Saudi Arabia and Tanzania); the *OnSite*-RDT is registered in Latin America (Argentina, Bolivia, Brazil, Colombia, Dominican Republic, Ecuador, El Salvador, Guatemala, Honduras, Mexico, Nicaragua, Paraguay, Peru, and Venezuela), Asia (Bangladesh, Cambodia, India, Indonesia, Laos, Malaysia, Myanmar, Nepal, Pakistan, Philippines, Sri Lanka, Thailand, and Vietnam), and elsewhere (EU, Mozambique, and Saudi Arabia).

**Table S2. Dengue serostatus by the reference algorithm**

| Group | Serostatus based on reference tests |                      |                | Interpretation         |
|-------|-------------------------------------|----------------------|----------------|------------------------|
|       | PRNT <sub>90</sub> *                | PRNT <sub>50</sub> * | NS1 IgG ELISA† |                        |
| 1     | Negative                            | Negative             | Negative       | Reference seronegative |
| 2     | Negative                            | Positive             | Negative       | Reference seronegative |
| 3     | Negative                            | Negative             | Low Positive   | Reference seronegative |
| 4     | Negative                            | Positive             | Low Positive   | Reference seropositive |
| 5     | Negative                            | Any‡                 | High Positive  | Reference seropositive |
| 6     | Positive                            | Positive             | Any‡           | Reference seropositive |

\*PRNT<sub>50</sub> & PRNT<sub>90</sub> positive is defined by titer  $\geq 10$  (1/dil) against  $\geq 1$  dengue serotype; †Dengue NS1 IgG ELISA results are classified as negative (titer  $< 9$  EU/ml), low positive ( $\geq 9$  to  $< 50$  EU/ml) and high positive ( $\geq 50$  EU/ml). ‡Positive or negative.

ELISA, enzyme-linked immunosorbent assay; Ig, immunoglobulin; NS1, non-structural protein 1; PRNT, plaque reduction neutralization test.

**Table S3. Baseline dengue serostatus in the immunogenicity subsets of CYD14 and CYD15 by the reference algorithm and treatment assignment**

| Reference Group     | Participants by group, n (%) |                        |                        |
|---------------------|------------------------------|------------------------|------------------------|
|                     | Total population (N=3962)    | CYD-TDV Group (N=2643) | Placebo Group (N=1319) |
| 1                   | 875 (22·1)                   | 568 (21·5)             | 307 (23·3)             |
| 2                   | 208 (5·2)                    | 161 (6·1)              | 47 (3·6)               |
| 3                   | 144 (3·6)                    | 96 (3·6)               | 48 (3·6)               |
| <b>Seronegative</b> | <b>1227 (31·0)</b>           | <b>825 (31·2)</b>      | <b>402 (30·5)</b>      |
| 4                   | 59 (1·5)                     | 45 (1·7)               | 14 (1·1)               |
| 5                   | 29 (0·7)                     | 19 (0·7)               | 10 (0·8)               |
| 6                   | 2647* (66·8)                 | 1754 (66·4)            | 893 (67·8)             |
| <b>Seropositive</b> | <b>2735 (69·0)</b>           | <b>1818 (68·8)</b>     | <b>917 (69·5)</b>      |

Of the above samples with dengue reference testing, ≤3962 were tested by one or more immunoassays.

\*5 participants in Group 6 did not have evaluable results in any of the immunoassays and so are not included in this total.

**Table S4. Baseline characteristics of the EUROIMMUN-ELISA test positive participants**

|                                        | <b>CYD-TDV group<br/>(N=1575)</b> | <b>Placebo group<br/>(N=796)</b> |
|----------------------------------------|-----------------------------------|----------------------------------|
| <b>Sex, male, n (%)</b>                | 746 (47.4)                        | 411 (51.6)                       |
| <b>Mean age, years (SD)</b>            | 11.4 (3.1)                        | 11.5 (3.0)                       |
| <b>Age group, n (%)</b>                |                                   |                                  |
| ≥9 years                               | 1336 (84.8)                       | 679 (85.3)                       |
| <9 years                               | 239 (15.2)                        | 117 (14.7)                       |
| ≥6 years                               | 1446 (91.8)                       | 738 (92.7)                       |
| <b>Ethnic origin, n (%)</b>            |                                   |                                  |
| Asian                                  | 612 (38.9)                        | 324 (40.7)                       |
| Black                                  | 34 (2.2)                          | 11 (1.4)                         |
| Caucasian                              | 37 (2.3)                          | 22 (2.8)                         |
| Hispanic                               | 0 (0)                             | 0 (0)                            |
| American<br>Indian/Alaska native       | 100 (6.3)                         | 46 (5.8)                         |
| Native<br>Hawaiian/Pacific<br>Islander | 0 (0)                             | 0 (0)                            |
| Other                                  | 792 (50.3)                        | 393 (49.4)                       |

Data pooled from CYD14 and CYD15.

**Table S5. Baseline characteristics of the Panbio-ELISA test positive participants**

|                                        | <b>CYD-TDV group<br/>(N=1637)</b> | <b>Placebo group<br/>(N=833)</b> |
|----------------------------------------|-----------------------------------|----------------------------------|
| <b>Sex, male, n (%)</b>                | 786 (48.0)                        | 424 (50.9)                       |
| <b>Mean age, years (SD)</b>            | 11.4 (3.1)                        | 11.4 (3.1)                       |
| <b>Age group, n (%)</b>                |                                   |                                  |
| ≥9 years                               | 1387 (84.7)                       | 698 (83.8)                       |
| <9 years                               | 250 (15.3)                        | 135 (16.2)                       |
| ≥6 years                               | 1503 (91.8)                       | 768 (92.2)                       |
| <b>Ethnic origin, n (%)</b>            |                                   |                                  |
| Asian                                  | 643 (39.3)                        | 346 (41.5)                       |
| Black                                  | 35 (2.1)                          | 13 (1.6)                         |
| Caucasian                              | 41 (2.5)                          | 27 (3.2)                         |
| Hispanic                               | 0 (0)                             | 0 (0)                            |
| American<br>Indian/Alaska native       | 101 (6.2)                         | 46 (5.5)                         |
| Native<br>Hawaiian/Pacific<br>Islander | 0 (0)                             | 0 (0)                            |
| Other                                  | 817 (49.9)                        | 401 (48.1)                       |

Data pooled from CYD14 and CYD15.



**Table S6. Baseline characteristics of the TELL ME FAST-RDT test positive participants**

|                                        | <b>CYD-TDV group<br/>(N=935)</b> | <b>Placebo group<br/>(N=493)</b> |
|----------------------------------------|----------------------------------|----------------------------------|
| <b>Sex, male, n (%)</b>                | 437 (46.7)                       | 254 (51.5)                       |
| <b>Mean age, years (SD)</b>            | 11.7 (2.9)                       | 11.7 (2.9)                       |
| <b>Age group, n (%)</b>                |                                  |                                  |
| ≥9 years                               | 827 (88.4)                       | 437 (88.6)                       |
| <9 years                               | 108 (11.6)                       | 56 (11.4)                        |
| ≥6 years                               | 874 (93.5)                       | 461 (93.5)                       |
| <b>Ethnic origin, n (%)</b>            |                                  |                                  |
| Asian                                  | 300 (32.1)                       | 173 (35.1)                       |
| Black                                  | 17 (1.8)                         | 6 (1.2)                          |
| Caucasian                              | 26 (2.8)                         | 15 (3.0)                         |
| Hispanic                               | 0 (0)                            | 0 (0)                            |
| American<br>Indian/Alaska native       | 81 (8.7)                         | 34 (6.9)                         |
| Native<br>Hawaiian/Pacific<br>Islander | 0 (0)                            | 0 (0)                            |
| Other                                  | 511 (54.7)                       | 265 (53.8)                       |

Data pooled from CYD14 and CYD15.

**Table S7. Baseline characteristics of the SD BIOLINE-RDT test positive participants**

|                                        | <b>CYD-TDV group<br/>(N=1289)</b> | <b>Placebo group<br/>(N=649)</b> |
|----------------------------------------|-----------------------------------|----------------------------------|
| <b>Sex, male, n (%)</b>                | 623 (48·3)                        | 330 (50·8)                       |
| <b>Mean age, years (SD)</b>            | 11.5 (3·)                         | 11.6 (3·1)                       |
| <b>Age group, n (%)</b>                |                                   |                                  |
| ≥9 years                               | 1104 (85·6)                       | 560 (86·3)                       |
| <9 years                               | 185 (14·4)                        | 89 (13·7)                        |
| ≥6 years                               | 1186 (92·0)                       | 604 (93·1)                       |
| <b>Ethnic origin, n (%)</b>            |                                   |                                  |
| Asian                                  | 447 (34·7)                        | 235 (36·2)                       |
| Black                                  | 36 (2·8)                          | 12 (1·8)                         |
| Caucasian                              | 44 (3·4)                          | 28 (4·3)                         |
| Hispanic                               | 0 (0)                             | 0 (0)                            |
| American<br>Indian/Alaska native       | 89 (6·9)                          | 39 (6·0)                         |
| Native<br>Hawaiian/Pacific<br>Islander | 0 (0)                             | 0 (0)                            |
| Other                                  | 673 (52·2)                        | 335 (51·6)                       |

Data pooled from CYD14 and CYD15.

**Table S8. Baseline characteristics of the *OnSite*-RDT test positive participants**

|                                        | <b>CYD-TDV group<br/>(N=867)</b> | <b>Placebo group<br/>(N=442)</b> |
|----------------------------------------|----------------------------------|----------------------------------|
| <b>Sex, male, n (%)</b>                | 400 (46.1)                       | 221 (50.0)                       |
| <b>Mean age, years (SD)</b>            | 11.6 (3.0)                       | 11.7 (3.0)                       |
| <b>Age group, n (%)</b>                |                                  |                                  |
| ≥9 years                               | 759 (87.5)                       | 388 (87.8)                       |
| <9 years                               | 108 (12.5)                       | 54 (12.2)                        |
| ≥6 years                               | 804 (92.7)                       | 413 (93.4)                       |
| <b>Ethnic origin, n (%)</b>            |                                  |                                  |
| Asian                                  | 312 (36.0)                       | 165 (37.3)                       |
| Black                                  | 20 (2.3)                         | 5 (1.1)                          |
| Caucasian                              | 21 (2.4)                         | 10 (2.3)                         |
| Hispanic                               | 0 (0)                            | 0 (0)                            |
| American<br>Indian/Alaska native       | 44 (5.1)                         | 26 (5.9)                         |
| Native<br>Hawaiian/Pacific<br>Islander | 0 (0)                            | 0 (0)                            |
| Other                                  | 470 (54.2)                       | 236 (53.4)                       |

Data pooled from CYD14 and CYD15.

**Table S9. Vaccine efficacy against symptomatic VCD in test-positive subjects by different age cut offs (Month 0 – Month 25)**

|                                  | CYD-TDV group |                            | Placebo group |                            | Vaccine Efficacy (95% CI) |
|----------------------------------|---------------|----------------------------|---------------|----------------------------|---------------------------|
|                                  | n/N           | Density incidence (95% CI) | n/N           | Density incidence (95% CI) |                           |
| <b>Participants ≥9 years</b>     |               |                            |               |                            |                           |
| EUROIMMUN-ELISA                  | 5/1336        | 0.2 (0.1, 0.4)             | 33/679        | 2.5 (1.7, 3.5)             | 92.4 (80.6, 97.0)         |
| Panbio-ELISA                     | 8/1387        | 0.3 (0.1, 0.6)             | 34/698        | 2.5 (1.7, 3.5)             | 88.3 (74.8, 94.6)         |
| TELL ME FAST-RDT                 | 3/827         | 0.2 (0.0, 0.5)             | 15/437        | 1.7 (1.0, 2.9)             | 89.3 (63.0, 96.9)         |
| SD BIOLINE-RDT                   | 9/1104        | 0.4 (0.2, 0.8)             | 25/560        | 2.3 (1.5, 3.4)             | 81.8 (60.9, 91.5)         |
| <i>OnSite</i> -RDT               | 1/759         | <0.1 (0.0, 0.4)            | 10/388        | 1.3 (0.6, 2.4)             | 94.9 (60.0, 99.3)         |
| <b>Participants ≥6 years</b>     |               |                            |               |                            |                           |
| EUROIMMUN-ELISA                  | 8/1446        | 0.3 (0.1, 0.5)             | 40/738        | 2.8 (2.0, 3.7)             | 89.8 (78.3, 95.2)         |
| Panbio-ELISA                     | 11/1503       | 0.4 (0.2, 0.7)             | 42/768        | 2.8 (2.0, 3.8)             | 86.6 (74.1, 93.1)         |
| TELL ME FAST-RDT                 | 4/874         | 0.2 (0.1, 0.6)             | 16/461        | 1.8 (1.0, 2.9)             | 86.6 (60.0, 95.5)         |
| SD BIOLINE-RDT                   | 11/1186       | 0.5 (0.2, 0.8)             | 31/604        | 2.6 (1.8, 3.7)             | 81.8 (63.9, 90.9)         |
| <i>OnSite</i> -RDT               | 2/804         | 0.1 (0.0, 0.4)             | 11/413        | 1.3 (0.7, 2.4)             | 90.6 (57.5, 97.9)         |
| <b>Participants &lt;9 years*</b> |               |                            |               |                            |                           |
| EUROIMMUN-ELISA                  | 6/239         | 1.3 (0.5, 2.7)             | 14/117        | 6.0 (3.3, 9.9)             | 79.4 (46.4, 92.1)         |
| Panbio-ELISA                     | 4/250         | 0.8 (0.2, 2.0)             | 15/135        | 5.6 (3.2, 9.1)             | 85.9 (57.5, 95.3)         |
| TELL ME FAST-RDT                 | 1/108         | 0.5 (0.0, 2.5)             | 4/56          | 3.6 (1.0, 8.9)             | 87.1 (-15.2, 98.6)        |
| SD BIOLINE-RDT                   | 3/185         | 0.8 (0.2, 2.3)             | 10/89         | 5.6 (2.7, 10.1)            | 85.9 (48.9, 96.1)         |
| <i>OnSite</i> -RDT               | 2/108         | 0.9 (0.1, 3.3)             | 5/54          | 4.6 (1.5, 10.5)            | 80.1 (-2.7, 96.1)         |

Data pooled from CYD14 and CYD15. Density incidence is presented as cases per 100 person-years; person-years at risk are the sum of years for which the participants contributed to the analysis; CI for the single proportion are calculated using the exact binomial method (Clopper-Pearson method); vaccine efficacy and associated CI are calculated using the Cox regression model.

CI, confidence interval; ELISA, enzyme-linked immunosorbent assay; n, number of cases; N, number of test-positive participants; RDT, rapid diagnostic test; VCD, virologically-confirmed dengue

\*participants from CYD14 only

**Table S10. Vaccine efficacy against hospitalised VCD in test positive subjects by different age cut offs (Month 0 – Month 72)**

|                                  | CYD-TDV group |                            | Placebo group |                            | Vaccine Efficacy (95% CI) |
|----------------------------------|---------------|----------------------------|---------------|----------------------------|---------------------------|
|                                  | n/N           | Density incidence (95% CI) | n/N           | Density incidence (95% CI) |                           |
| <b>Participants ≥9 years</b>     |               |                            |               |                            |                           |
| EUROIMMUN-ELISA                  | 6/1336        | <0·1 (0·0, 0·2)            | 8/679         | 0·2 (0·1, 0·4)             | 61·0 (–12·5, 86·5)        |
| Panbio-ELISA                     | 7/1387        | <0·1 (0·0, 0·2)            | 12/698        | 0·3 (0·2, 0·5)             | 70·3 (24·6, 88·3)         |
| TELL ME FAST-RDT                 | 0/827         | 0·0 (0·0, 0·1)             | 4/437         | 0·2 (0·0, 0·4)             | 100 (NC, 100)             |
| SD BIOLINE-RDT                   | 1/1104        | <0·1 (0·0, 0·1)            | 6/560         | 0·2 (0·1, 0·4)             | 91·4 (28·2, 99·0)         |
| <i>OnSite</i> -RDT               | 2/759         | <0·1 (0·0, 0·2)            | 2/388         | <0·1 (0·0, 0·3)            | 45·8 (–285·1, 92·4)       |
| <b>Participants ≥6 years</b>     |               |                            |               |                            |                           |
| EUROIMMUN-ELISA                  | 7/1446        | <0·1 (0·0, 0·2)            | 14/738        | 0·3 (0·2, 0·6)             | 73·7 (34·8, 89·4)         |
| Panbio-ELISA                     | 8/1503        | <0·1 (0·0, 0·2)            | 19/768        | 0·4 (0·3, 0·7)             | 78·0 (49·7, 90·4)         |
| TELL ME FAST-RDT                 | 0/874         | 0·0 (0·0, 0·1)             | 5/461         | 0·2 (0·1, 0·5)             | 100 (NC, 100)             |
| SD BIOLINE-RDT                   | 2/1186        | <0·1 (0·0, 0·1)            | 9/604         | 0·3 (0·1, 0·5)             | 88·3 (45·7, 97·5)         |
| <i>OnSite</i> -RDT               | 2/804         | <0·1 (0·0, 0·2)            | 4/413         | 0·2 (0·0, 0·4)             | 72·9 (–47·8, 95·0)        |
| <b>Participants &lt;9 years*</b> |               |                            |               |                            |                           |
| EUROIMMUN-ELISA                  | 3/239         | 0·2 (0·0, 0·6)             | 9/117         | 1·3 (0·6, 2·5)             | 84·0 (40·7, 95·7)         |
| Panbio-ELISA                     | 3/250         | 0·2 (0·0, 0·6)             | 11/135        | 1·4 (0·7, 2·5)             | 85·6 (48·5, 96·0)         |
| TELL ME FAST-RDT                 | 1/108         | 0·2 (0·0, 0·9)             | 3/56          | 0·9 (0·2, 2·7)             | 82·9 (–64·3, 98·2)        |
| SD BIOLINE-RDT                   | 2/185         | 0·2 (0·0, 0·7)             | 6/89          | 1·2 (0·4, 2·5)             | 84·4 (22·7, 96·9)         |
| <i>OnSite</i> -RDT               | 1/108         | 0·2 (0·0, 0·9)             | 4/54          | 1·3 (0·4, 3·3)             | 87·9 (–8·0, 98·7)         |

Data pooled from CYD14 and CYD15. Density incidence is presented as cases per 100 person-years; person-years at risk are the sum of years for which the participants contributed to the analysis; CI for the single proportion are calculated using the exact binomial method (Clopper-Pearson method); vaccine efficacy and associated CI are calculated using the Cox regression model.

CI, confidence interval; ELISA, enzyme-linked immunosorbent assay; n, number of cases; N, number of test-positive participants; NC, not calculable; RDT, rapid diagnostic test; VCD, virologically-confirmed dengue  
\*participants from CYD14 only
